# Supplementary material for: CircRNA accumulation in the aging mouse brain
Source: PubMed Central journal article supplement (PMC5153657; doi:10.1038/srep38907), 2016-12-13
Supplement: srep38907-s1.pdf [file srep38907-s1.pdf]

## SUPPLEMENTARY MATERIAL

### **CircRNA accumulation in the aging mouse brain**

Hannah Gruner, Mariela Cortés-López, Daphne A. Cooper, Matthew Bauer and Pedro Miura

#### **Supplementary Figure Legends:**

**Figure S1: Pipeline for circRNA annotation.** Using previously published annotations combined with de novo circRNA annotation using *find\_circ*, 6,791 circRNAs were annotated from 18 total RNA-seq libraries.

**Figure S2: PCR products from RT-qPCR reactions used to detect circRNAs. (a)** RT-qPCR products of circRNAs tested for age accumulation in 1 mo vs 22 mo cortex (See **Fig. 3C**). Products were amplified from mixed 1 and 22 mo cortex cDNA and were found to migrate at the expected sizes. **(b)** CircRNA products tested for expression in 1 mo, 6 mo, and 22 mo cortex and hippocampus (See **Fig. 3e,f**). RT-qPCR products from 22 mo cortex cDNA are shown, except for *Cwf19/2* which was amplified from 22 mo hippocampus cDNA.

**Figure S3: Multi-gene spanning circRNAs are likely artifacts. (a)** Example of previously annotated multi-gene circRNA (*mm9\_circ\_012873*) predicted to be formed from the paralogs *C4b* and *C4a*. **(b)** Schematic of strategy to test for the presence of *C4b/C4a* circRNA using Sanger sequencing. The adjacent mRNA-specific exon (blue) downstream of the predicted circularized *C4b* exon (green) is only one nucleotide different than the back-spliced exon from the *C4a* gene (orange). **(c)** Sanger sequencing performed on cortex RT-PCR products generated from outward facing primers reveals that the sequenced product matched the predicted mRNA sequence, but not the circRNA sequence. **(d)** RNase R treatment followed by qRT-PCR reveals that *mm9\_circ\_012873* multi-gene spanning circRNA is not RNase R resistant, and thus the

product is likely indicative of a linear RNA. Amplification of the cDNA from *Psmc4* linear RNA was performed as a positive control.

**Figure S4: MicroRNA seed sites in *Acin1* circRNA** (mmu\_circ\_0005278). The circRNA mmu\_circ\_0005278 is upregulated during aging in cortex and harbors 4 target sites for miR-9, a neural-specific microRNA (highlighted in pink). Screen shot from UCSC genome browser tracks shows broadly conserved microRNA target sites at the *Acin1* locus (yellow shaded box). Sequence alignment from multiple vertebrate species is shown at one of the miR-9 target sites. Matching of miR-9-5p to one target site is shown (7mer-m8 match). See Supplementary Tables S9-S14 for microRNA target site analysis. See Supplementary Table S2 for circRNA expression changes during aging in cortex.

**Figure S5: Principal component analysis on linear and circular RNAs.** (a) PCA performed on linear RNA data expressed in FPKM. Neural versus cardiac tissues are separated by PC1. The neural tissues (cortex and hippocampus) are separated from each other by PC3. Separation by age (1 mo vs 22 mo) along PC3 is visible for the neural tissues but not the heart. (b) PCA performed on circRNA data expressed in TPM. Separation by tissue type (neural vs cardiac- PC1) and specific tissues (cortex versus hippocampus versus heart- PC3) is observed. Separation by age (1 mo vs 22 mo- PC3) is found for cortex and hippocampus, but not heart.

#### **Supplementary Table Legends:**

**Table S1:** RNA-seq read statistics

**Table S2:** Cortex circRNA expression data

**Table S3:** Hippocampus circRNA expression data

**Table S4:** Heart circRNA expression data

**Table S5:** Oligonucleotides used for PCR, qPCR and Northern blot probes

**Table S6:** Gene Ontology analysis for circRNA age-regulated circRNA loci in cortex

**Table S7:** Gene Ontology analysis for circRNA age-regulated circRNA loci in hippocampus

**Table S8:** Gene Ontology analysis for circRNA age-regulated circRNA loci in heart

**Table S9:** MicroRNA target site analysis for all cortex circRNAs

**Table S10:** MicroRNA target site analysis for age-upregulated cortex circRNAs

**Table S11:** MicroRNA target site analysis for age-downregulated cortex circRNAs

**Table S12:** MicroRNA target site analysis for all hippocampus circRNAs

**Table S13:** MicroRNA target site analysis for age-upregulated hippocampus circRNAs

**Table S14:** MicroRNA target site analysis for age-downregulated hippocampus circRNAs

**Table S15:** Linear RNA differential expression analysis for young versus old cortex

**Table S16:** Linear RNA differential expression analysis for young versus old hippocampus

**Table S17:** Linear RNA differential expression analysis for young versus old heart

**Table S18:** Gene Ontology analysis for age-regulated linear RNA loci from cortex

**Table S19:** Gene Ontology analysis for age-regulated linear RNA loci from hippocampus

**Table S20:** Gene Ontology analysis for age-regulated linear RNA loci from heart

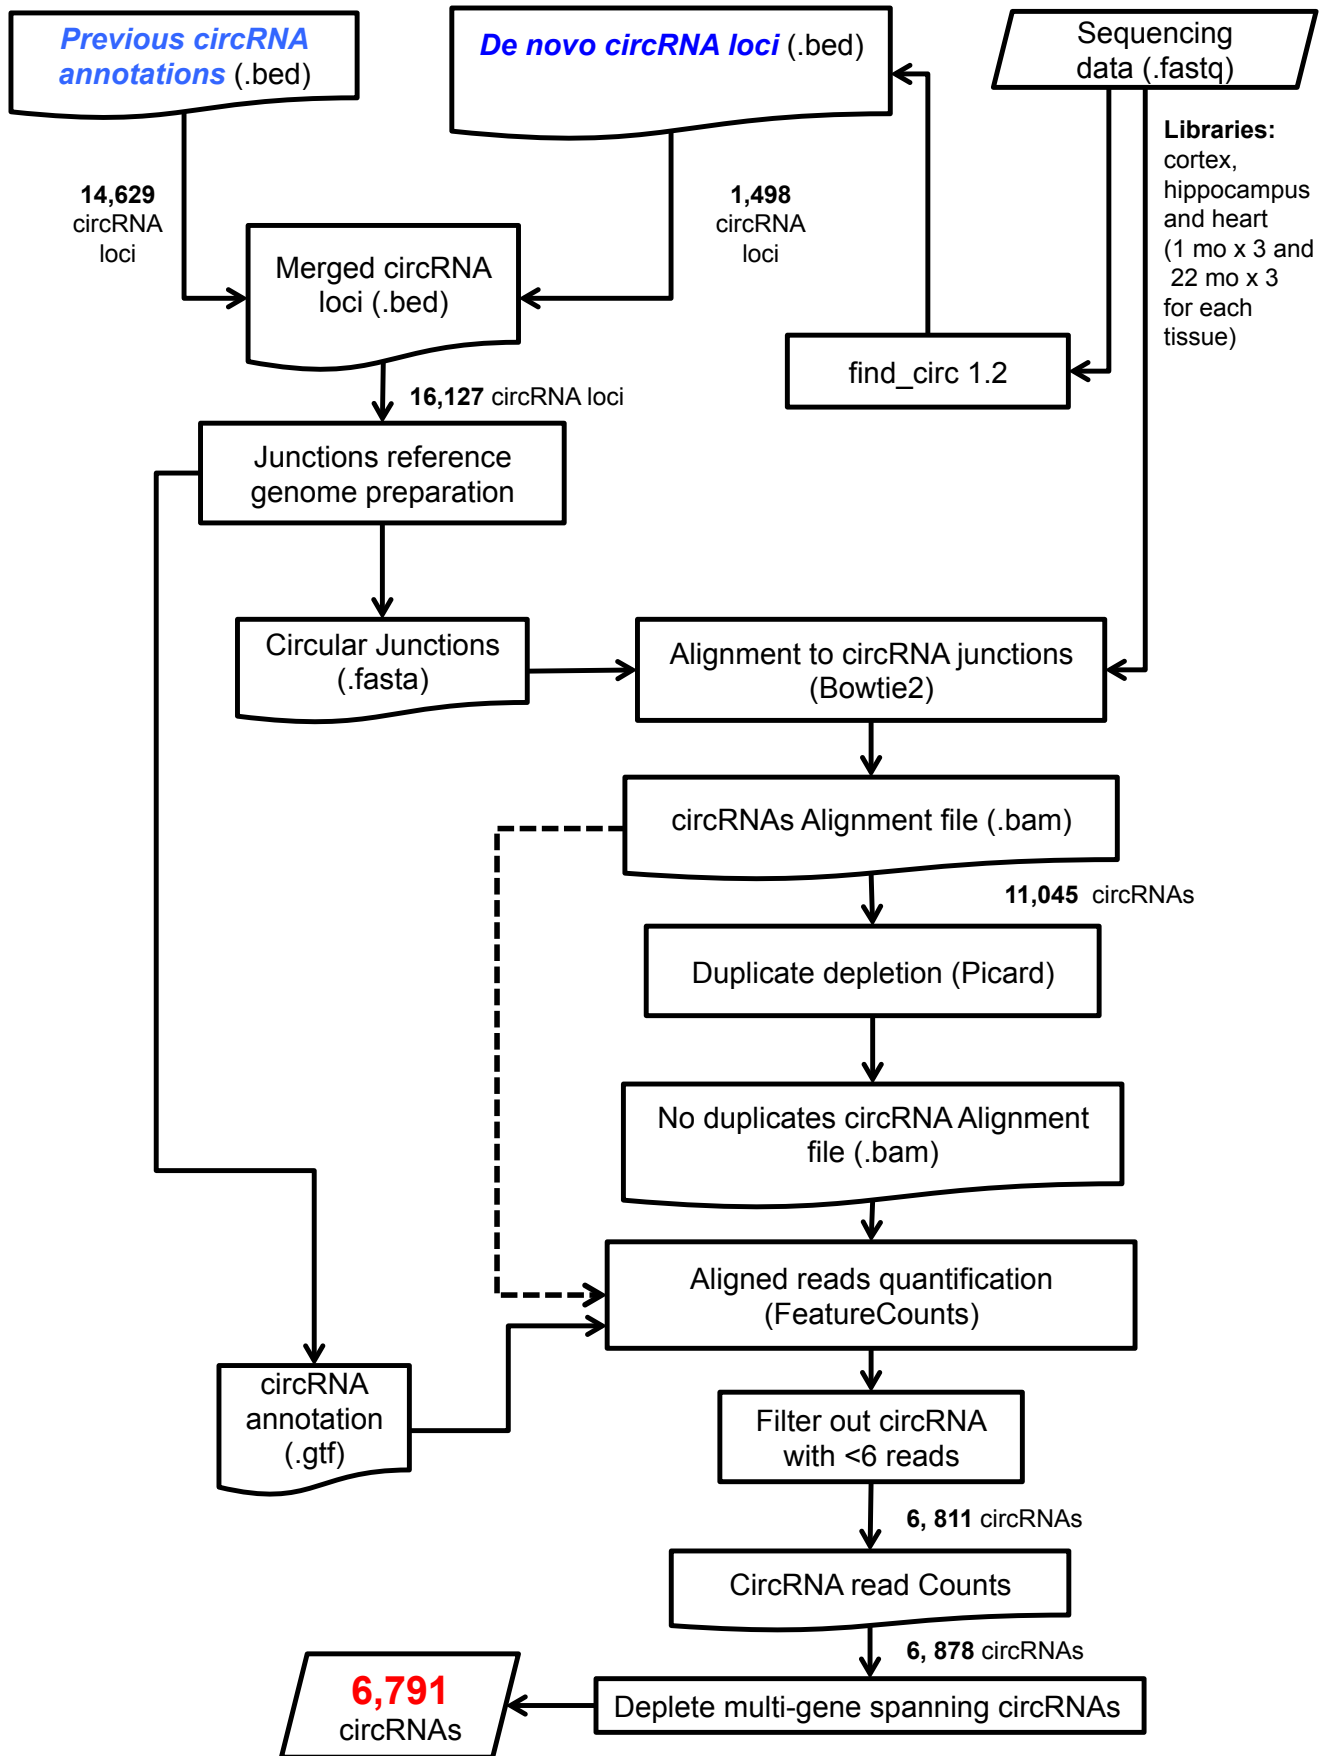

Supplementary Figure S1: Pipeline for circRNA annotation

a

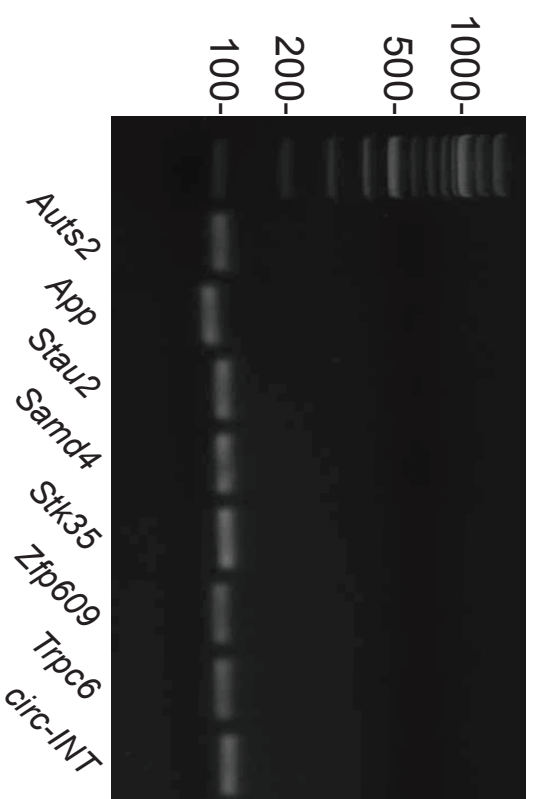

b

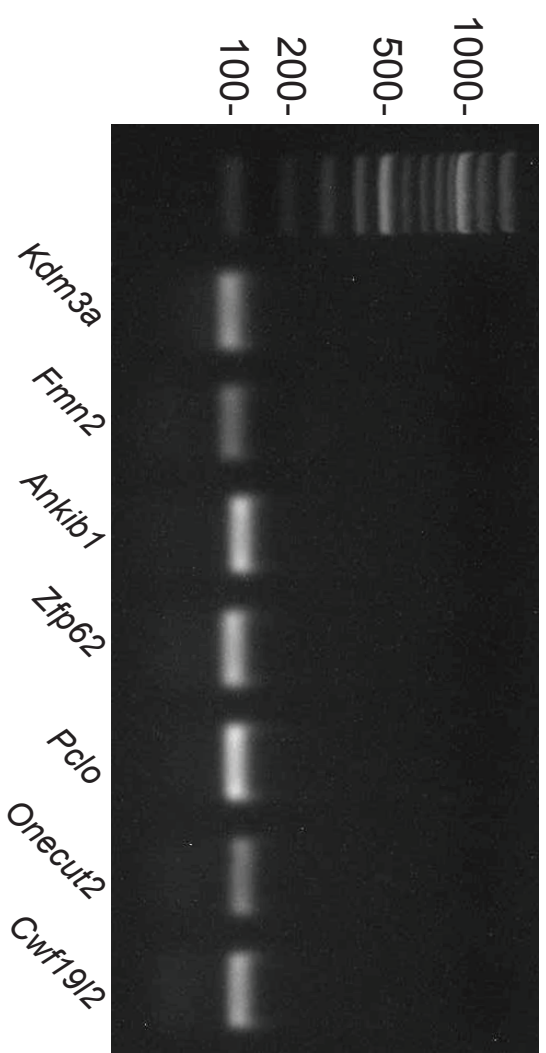

Supplementary Figure S2: PCR products from RT-qPCR reactions used to detect circRNAs

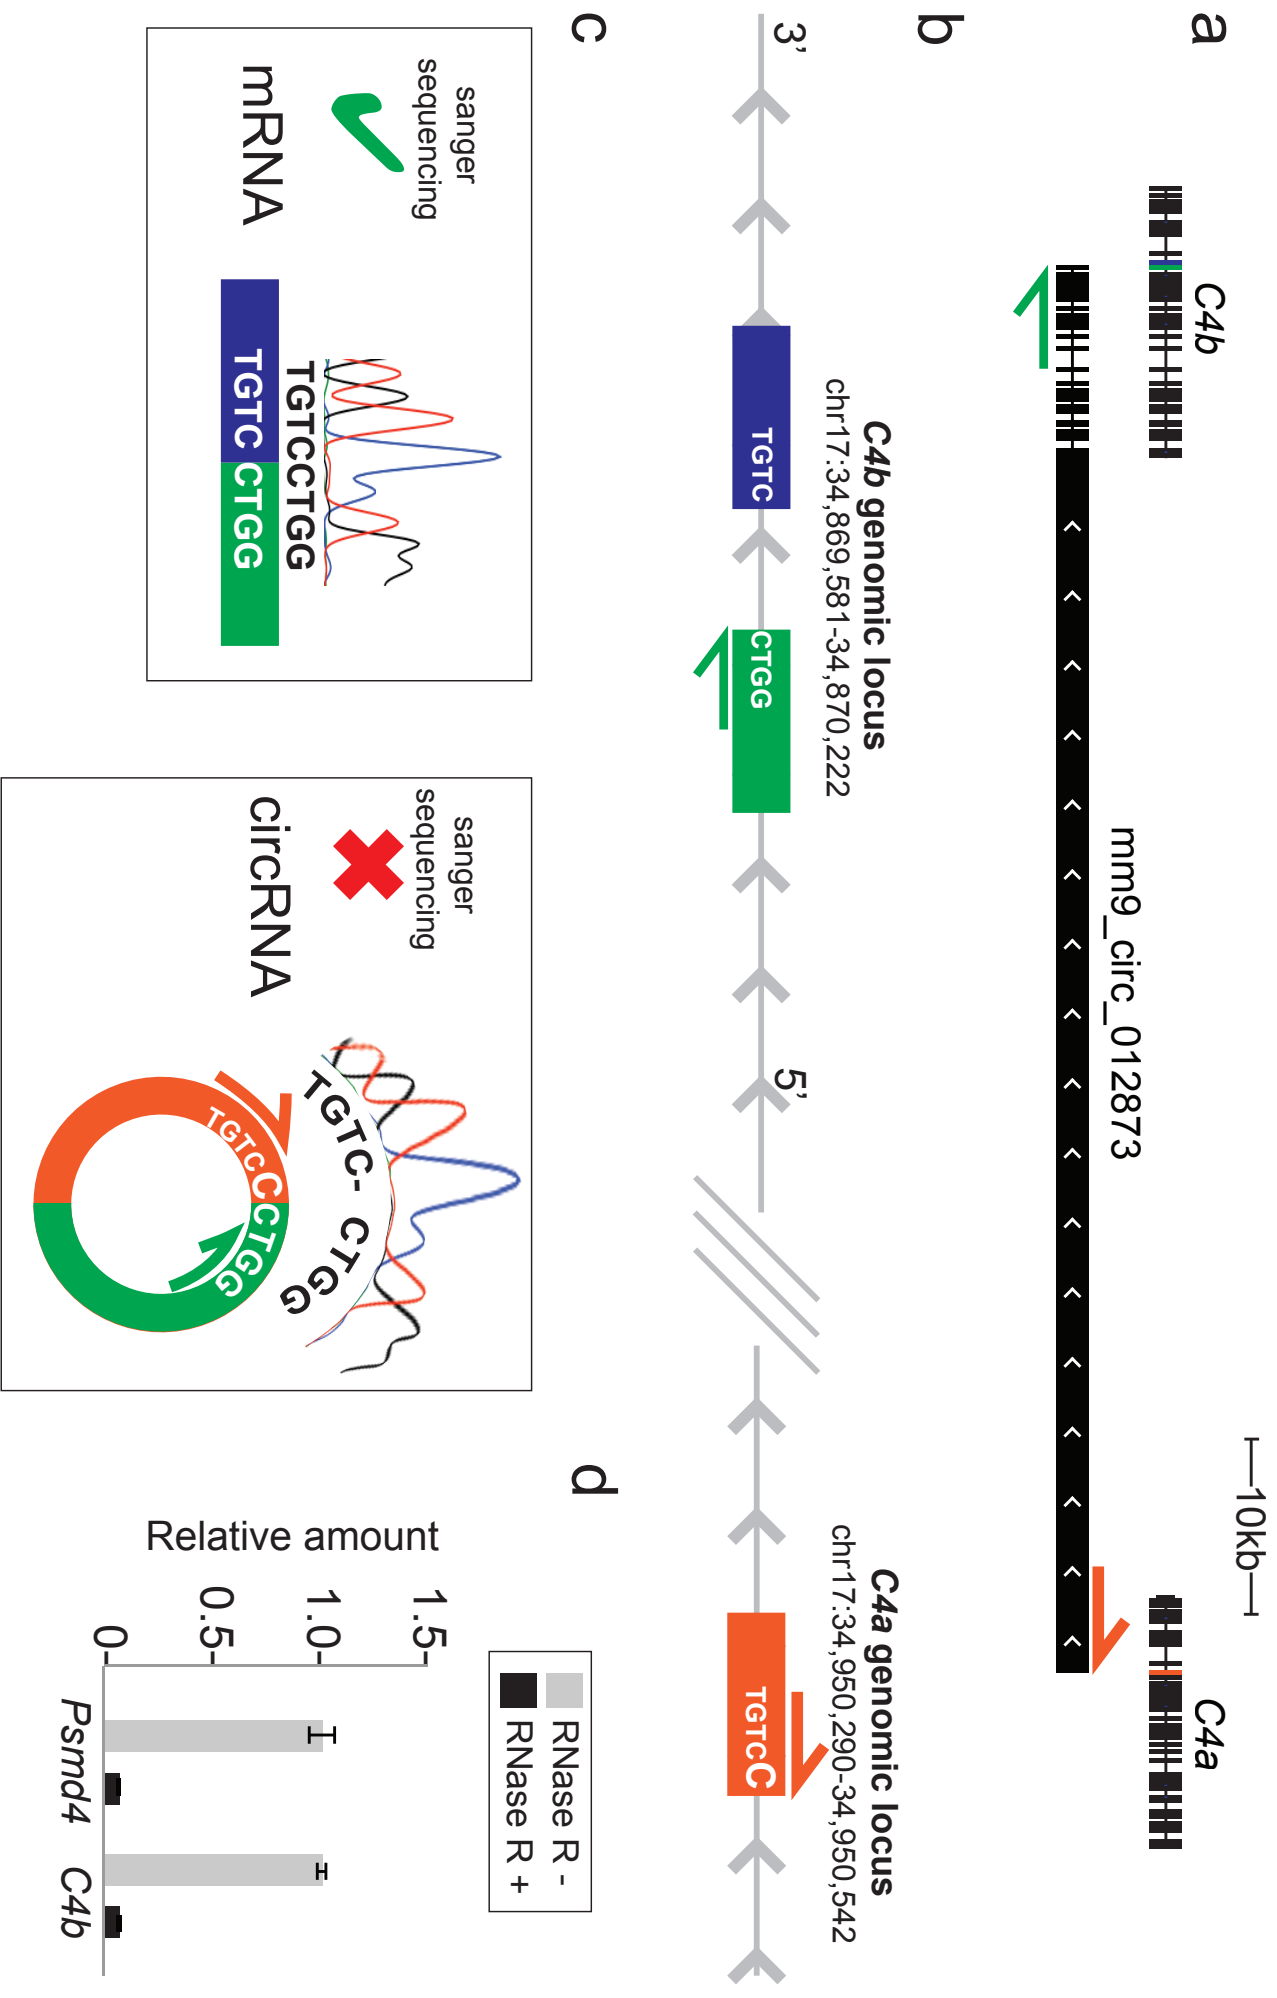

Supplementary Figure S3: Multi-gene spanning circRNAs are likely artifacts.



**a** linear RNA FPKM

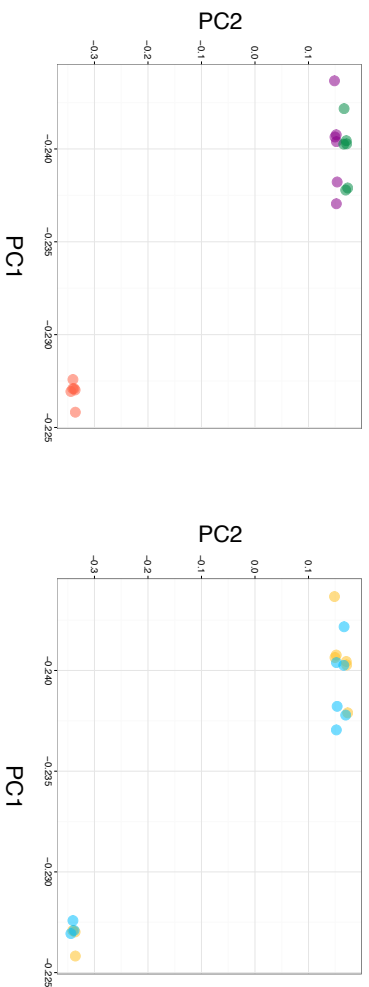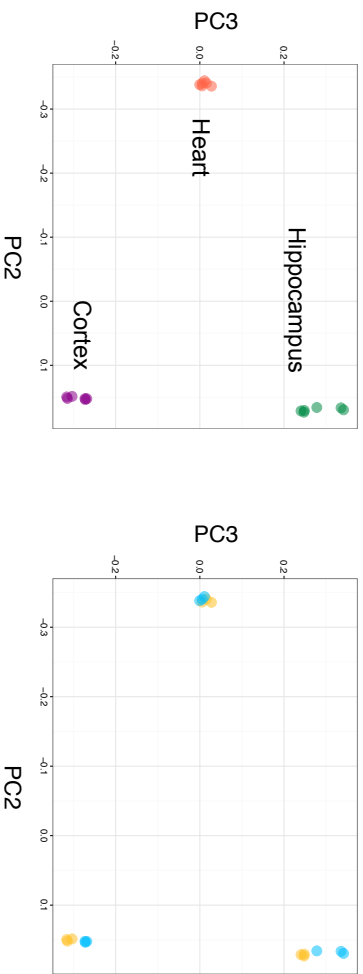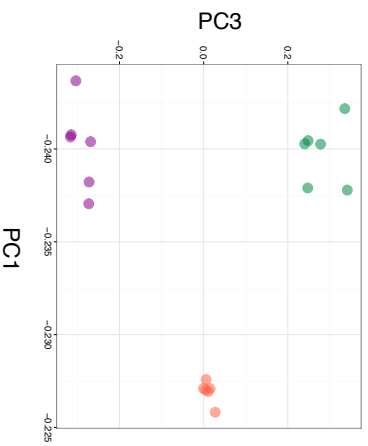

**b** circRNA TPM

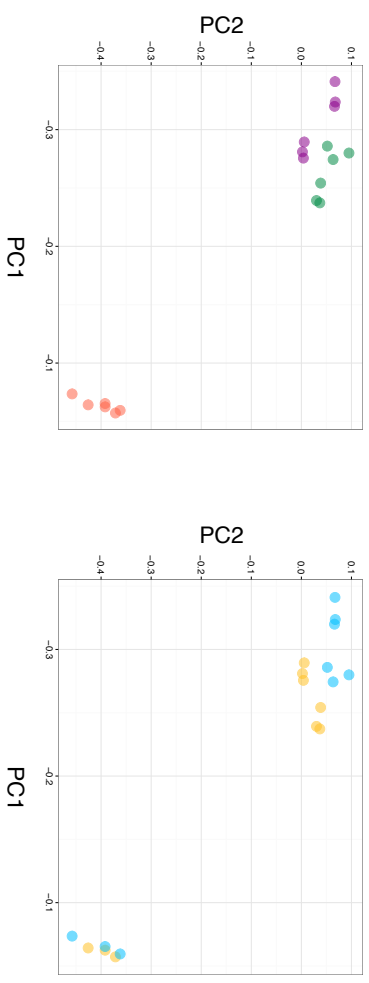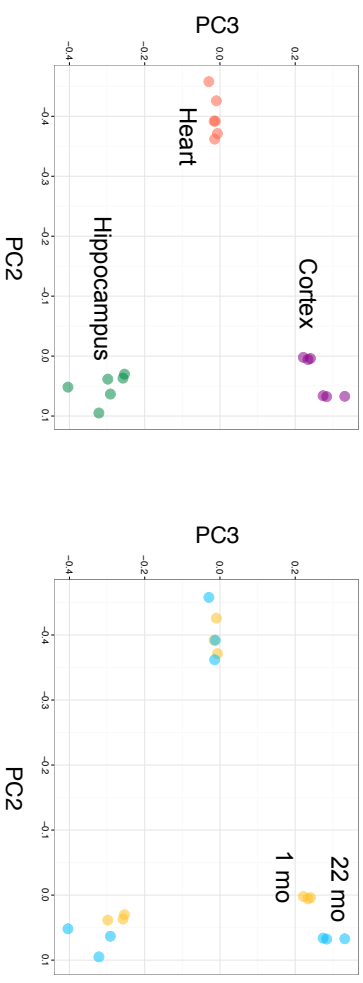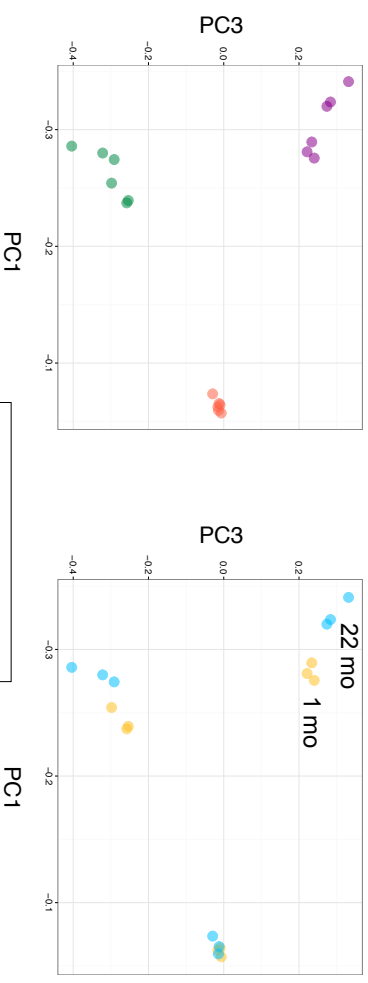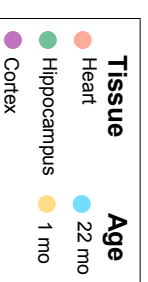

Supplementary Figure S5: Principal Component Analysis
